# Supplementary material for: Water-soluble luminescent copper nanoclusters reduced and protected by histidine for sensing of guanosine 5′-triphosphate
Source: Royal Society of Chemistry journal article supplement (doi:10.1039/c4nj00731j), 2014-05-22
Supplement: c4nj00731j1.pdf [file c4nj00731j1.pdf]

## Electronic Supplementary Information

*for*

### Water-soluble luminescent copper nanoclusters reduced and protected by histidine for sensing of guanosine 5'-triphosphate

Xi Juan Zhao,<sup>a,b</sup> Cheng Zhi Huang<sup>a,c\*</sup>

<sup>a</sup> Key Laboratory of Luminescent and Real-Time Analytical Chemistry (Southwest University), Ministry of Education, College of Chemistry and Chemical Engineering, Southwest University, Chongqing 400715, <sup>b</sup> College of Horticulture and Landscape Architecture, Southwest University, Chongqing, 400716, PR China, <sup>c</sup> College of Pharmaceutical Science, Southwest University, Chongqing 400715, PR China

#### Supporting Figures

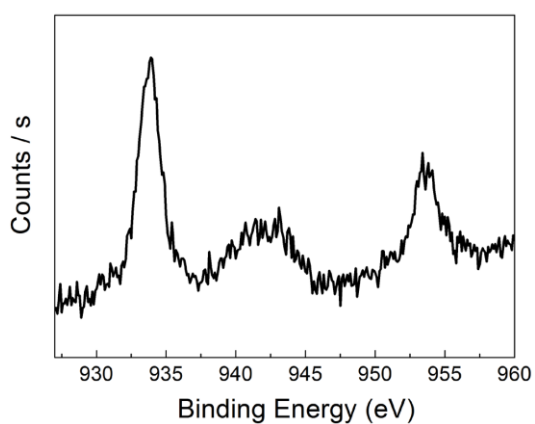

**Fig. S1** XPS spectrum of Cu 2p electrons in dried Cu NCs.

---

\* Corresponding author. Tel.: +86-23-68254659; Fax: +86-23-68367257.

E-mail address: [chengzhi@swu.edu.cn](mailto:chengzhi@swu.edu.cn) (C. Z. Huang)

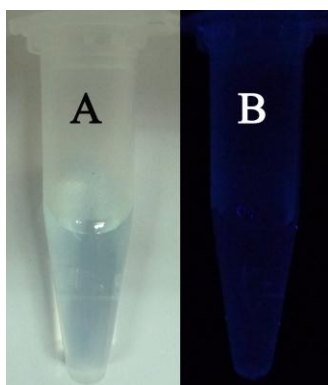

**Fig. S2** Photographs of alanine and  $\text{CuCl}_2$  refluxed for 12 hours at  $70\text{ }^\circ\text{C}$  under daylight (A) and under 365 nm UV lamp light (B).  $c_{\text{alanine}}$ , 112.5 mM;  $c_{\text{CuCl}_2}$ , 2.5 mM.

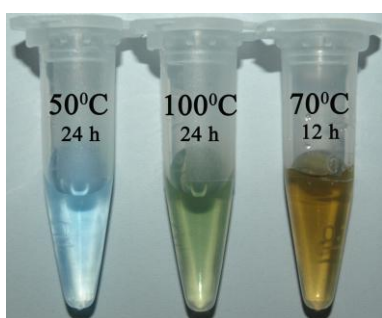

**Fig. S3** Effects of temperature on the synthesis of Cu NCs.

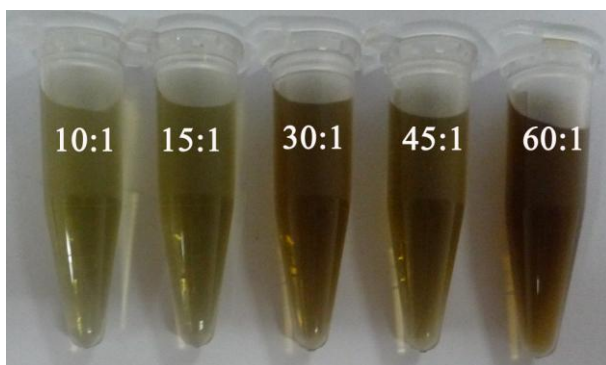

**Fig. S4** Effects of the ratio of histidine and  $\text{CuCl}_2$  on the synthesis of luminescent Cu NCs.  $c_{\text{CuCl}_2}$ , 2.5 mM,  $c_{\text{histidine}}/c_{\text{CuCl}_2} = 10:1, 15:1, 30:1, 45:1, \text{ and } 60:1$ .

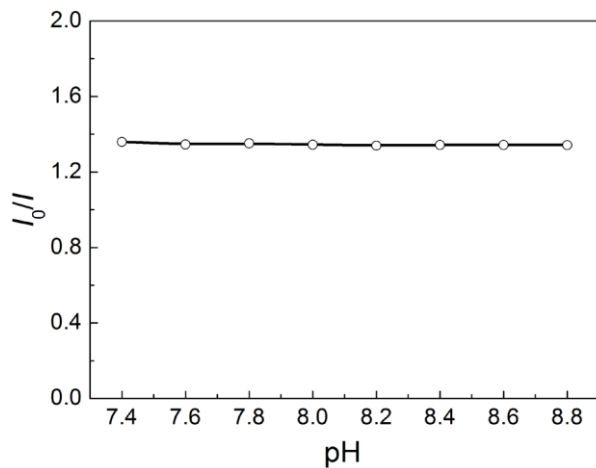

**Fig. S5** Effects of pH values on the quenching extent of Cu NCs induced by GTP.  $I_0$  and  $I$  represent the luminescence intensity of Cu NCs in the absence and presence of GTP, respectively.  $\lambda_{\text{ex}} = 350.0$  nm,  $\lambda_{\text{em}} = 456.0$  nm,  $c_{\text{GTP}} = 12$  mM, pH values of tris-HCl buffer, 7.4, 7.6, 7.8, 8.0, 8.2, 8.4, 8.6, 8.8.

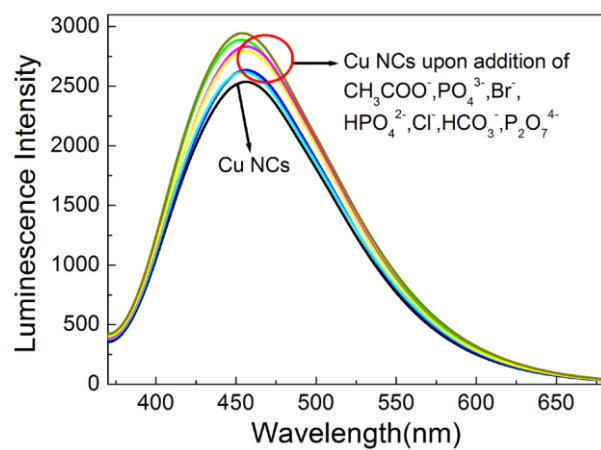

**Fig. S6** The luminescent responses of Cu NCs to some inorganic anions including  $\text{CH}_3\text{COO}^-$ ,  $\text{PO}_4^{3-}$ ,  $\text{Br}^-$ ,  $\text{HPO}_4^{2-}$ ,  $\text{Cl}^-$ ,  $\text{HCO}_3^-$ ,  $\text{P}_2\text{O}_7^{4-}$ .  $\lambda_{\text{ex}} = 350.0$  nm,  $c_{\text{anion}} = 12$  mM, pH 7.8 tris-HCl.
